# Supplementary material
Source: ML conference proceedings conference paper supplement (https://openaccess.thecvf.com/content/WACV2023/html/Zhou_SeCo_Separating_Unknown_WACV_2023_paper.html)
Supplement: Supplementary file 1 [file Zhou_SeCo_Separating_Unknown_WACV_2023_supplemental.zip]

Archive with 2 entries (2 files):
- SeCo_supp.pdf
- SeCo.mp4
